# Supplementary material
Source: Springer Nature journal article supplement (https://www.springermedizin.de/resource/supplementary/13023_2012_518_MOESM1_ESM.pdf/9642694)

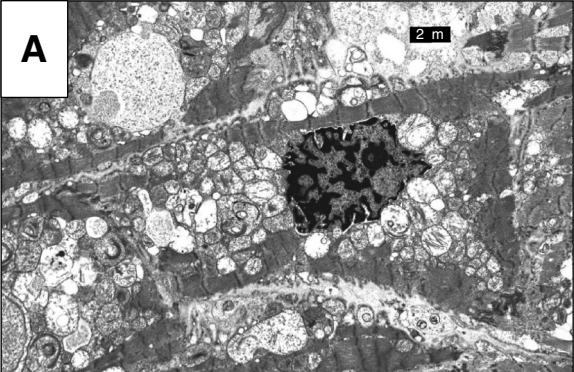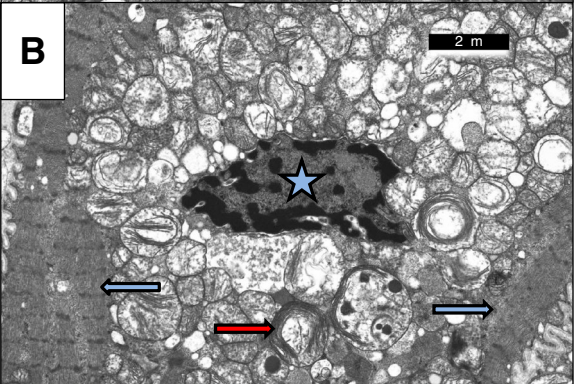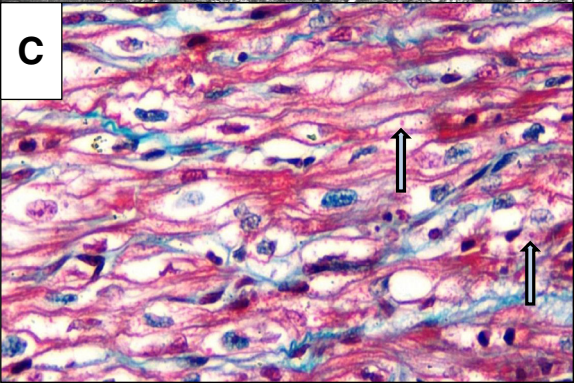

Supplement: MOESM1 [file 9642694]
